# Supplementary material for: Investigation of Excited-State Intramolecular Proton Transfer and Structural Dynamics in Bis-Benzimidazole Derivative (BBM)
Source: MDPI journal article supplement (doi:10.3390/ijms24119438), 2023-05-29
Supplement: s1 [file s1]

# Investigation of Excited State Intramolecular Proton Transfer and Structural Dynamics in Bis-benzimidazole Derivative (BBM)

Junhan Xie <sup>1</sup>, Ziyu Wang <sup>1</sup>, Ruixue Zhu <sup>1</sup>, Jiaming Jiang <sup>1</sup>, Tsu-Chien Weng <sup>1</sup>, Yi Ren <sup>1</sup>, Shuhua Han <sup>3</sup>, Yifan Huang <sup>1,\*</sup> and Weimin Liu <sup>1,2,\*</sup>

<sup>1</sup> School of Physical Science and Technology, ShanghaiTech University, Shanghai 201210, China

<sup>2</sup> STU and SIOM Joint Laboratory for Superintense Lasers and the Applications, Shanghai 201210, China

<sup>3</sup> Key Lab of Colloid and Interface Chemistry, Ministry of Education, Shandong University, Jinan 250100, China

<sup>†</sup>*These authors contributed equally to this work.*

*\* To whom correspondence should be addressed. E-mails: [liuwm@shanghaitech.edu.cn](mailto:liuwm@shanghaitech.edu.cn)*

*[huangyf@shanghaitech.edu.cn](mailto:huangyf@shanghaitech.edu.cn).*

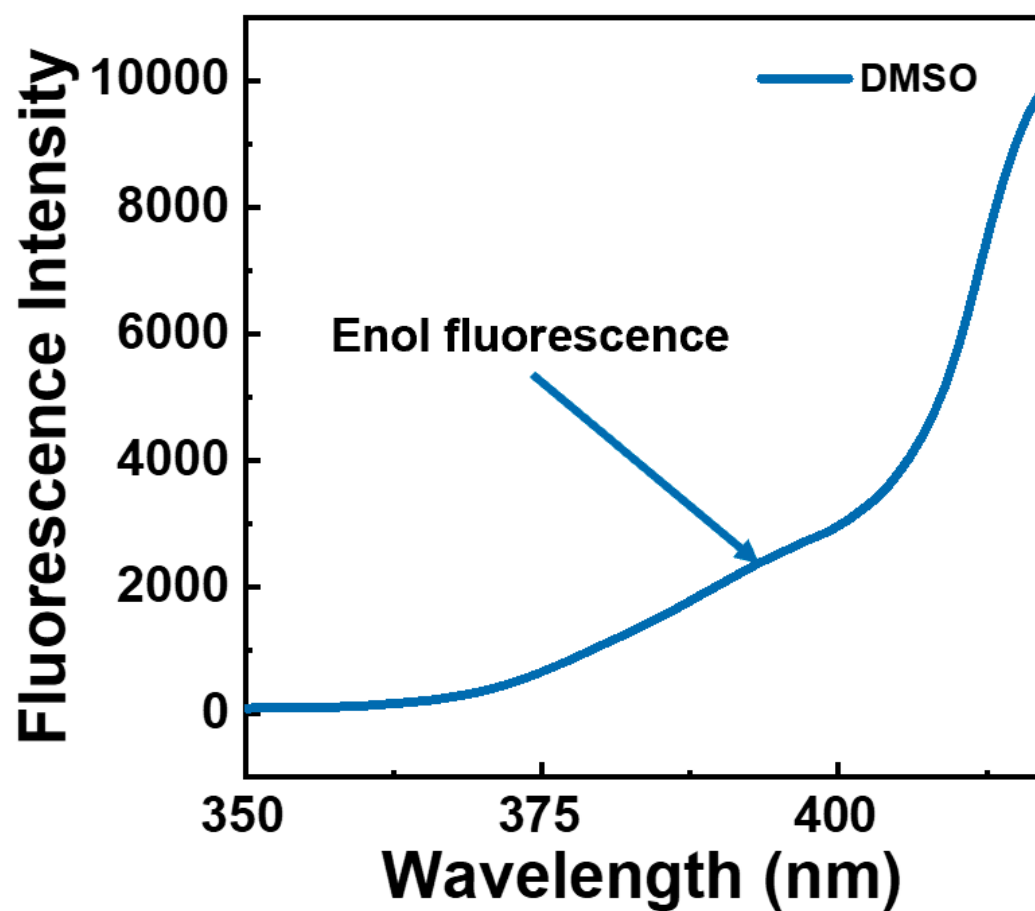

**Figure S1.** Steady-state fluorescence spectra of HBT in DMSO in the range of 350 to 430 nm.

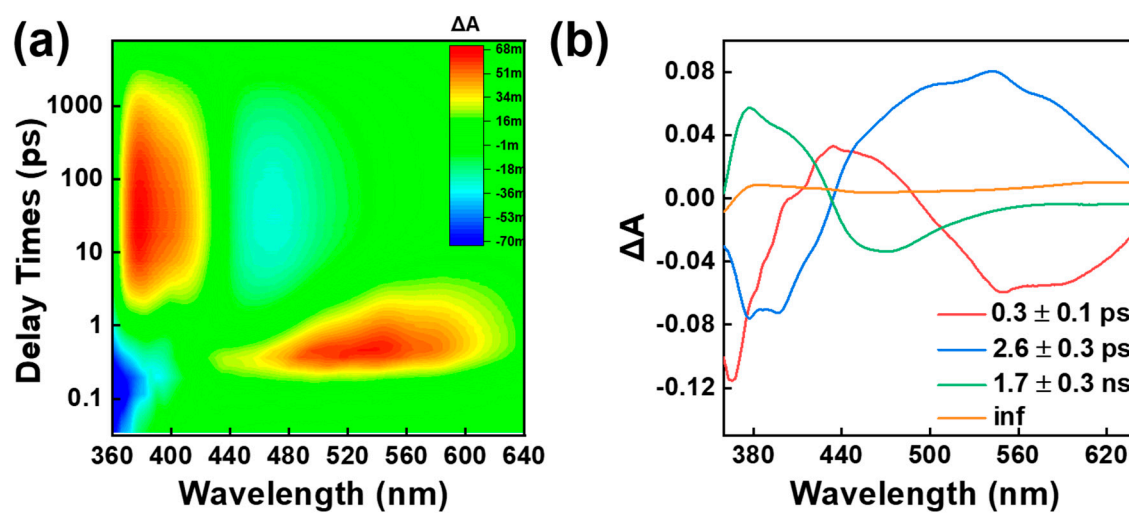

**Figure S2.** (a) 2D plot of TA spectrum of BBM in THF with 350 nm excitation (time delay is plotted using log scale). (b) Decay-associated difference spectra (DADS) of TA spectrum of BBM in THF.

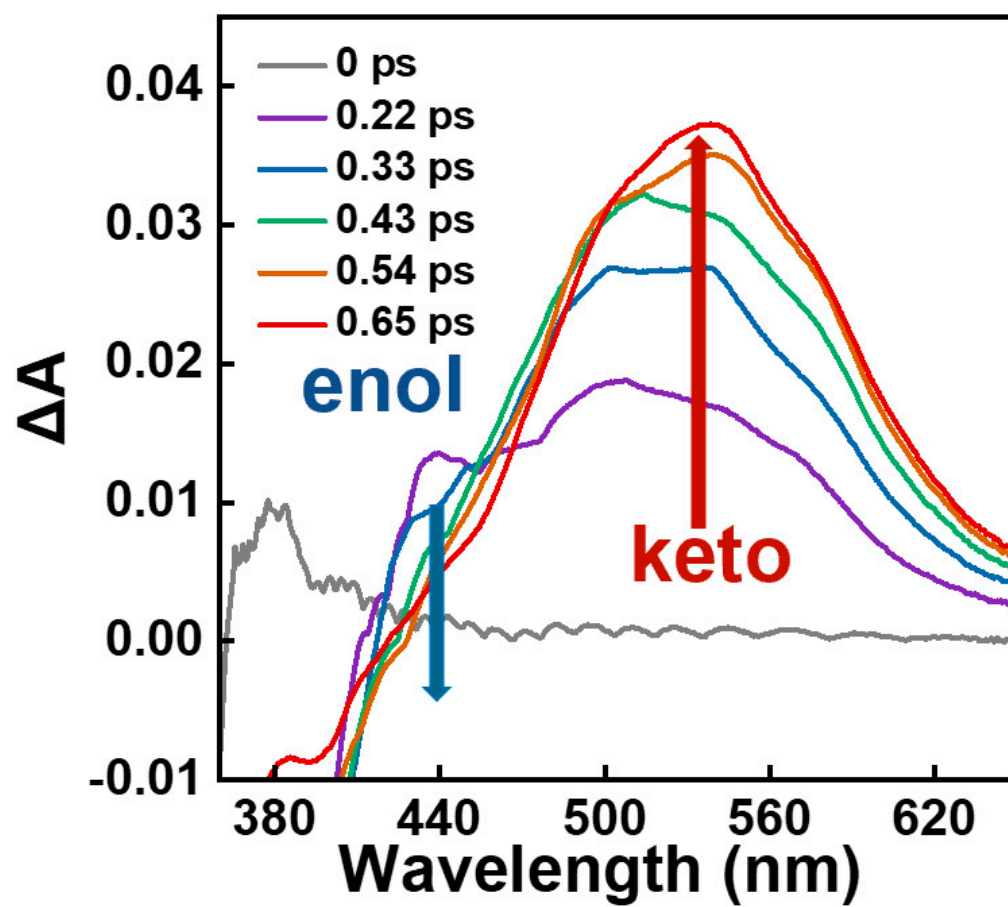

**Figure S3.** TA spectra of BBM in DMSO at different delay times between 0 and 0.65 ps.

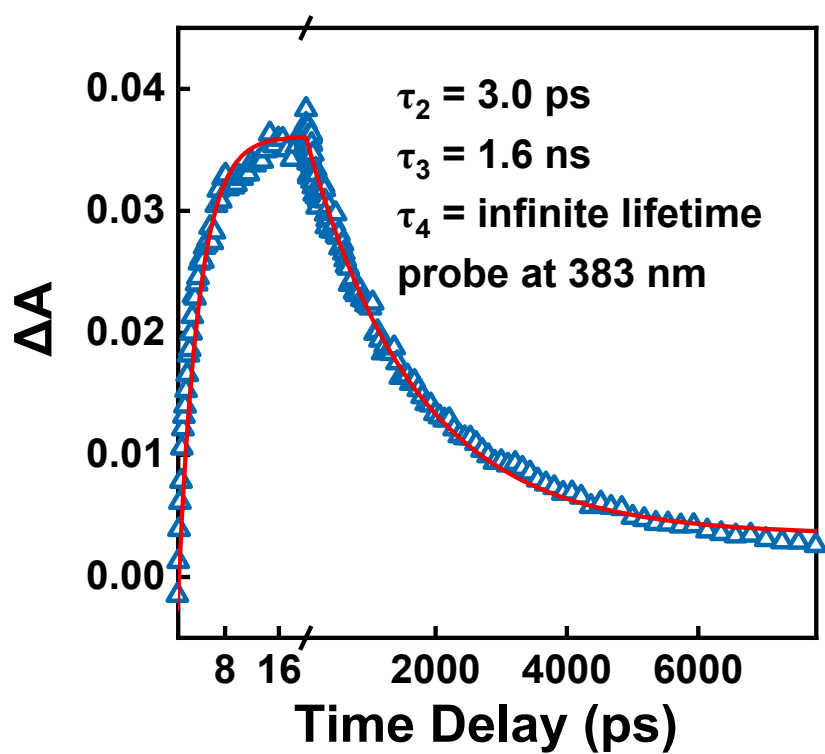

**Figure S4.** Transient amplitude of the TA spectra of BBM probe at 383 nm in DMSO.

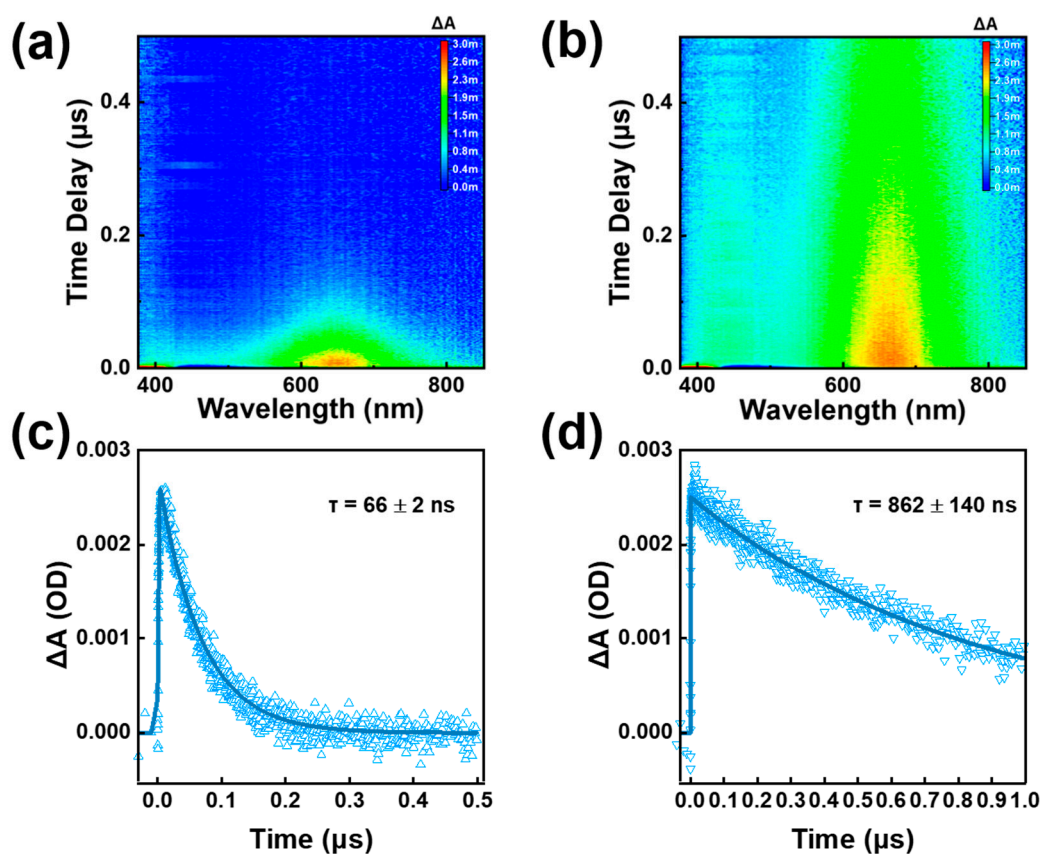

**Figure S5.** 2D plot of EOS-TA of BBM in (a) DMSO, and (b) THF, transient amplitude of the EOS-TA spectra of BBM probe at 667 nm in (c) DMSO, and (d) THF.

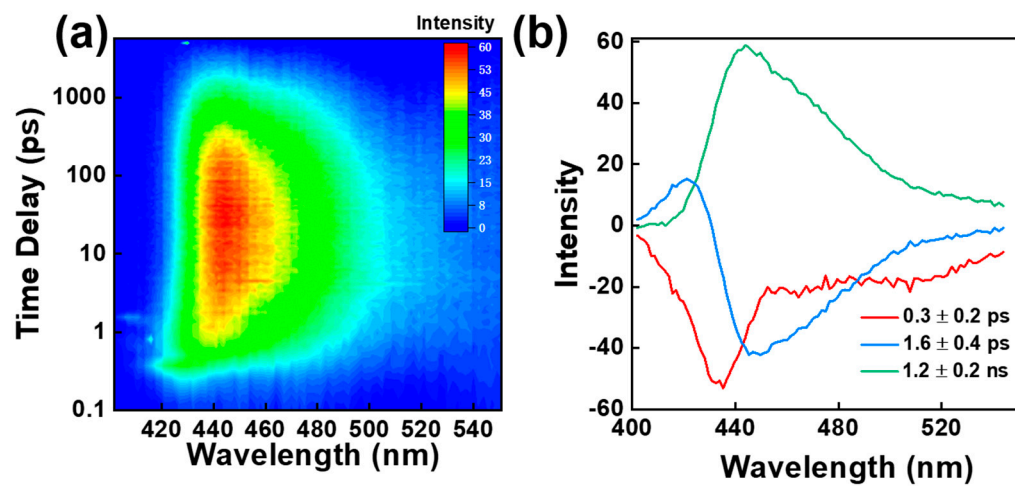

**Figure S6.** (a) 2D plot of fs fluorescence up-conversion spectra of BBM under 350 nm excitation in THF (time delay is plotted using log scale); (b) DADS of fs fluorescence up-conversion spectra of BBM in THF.

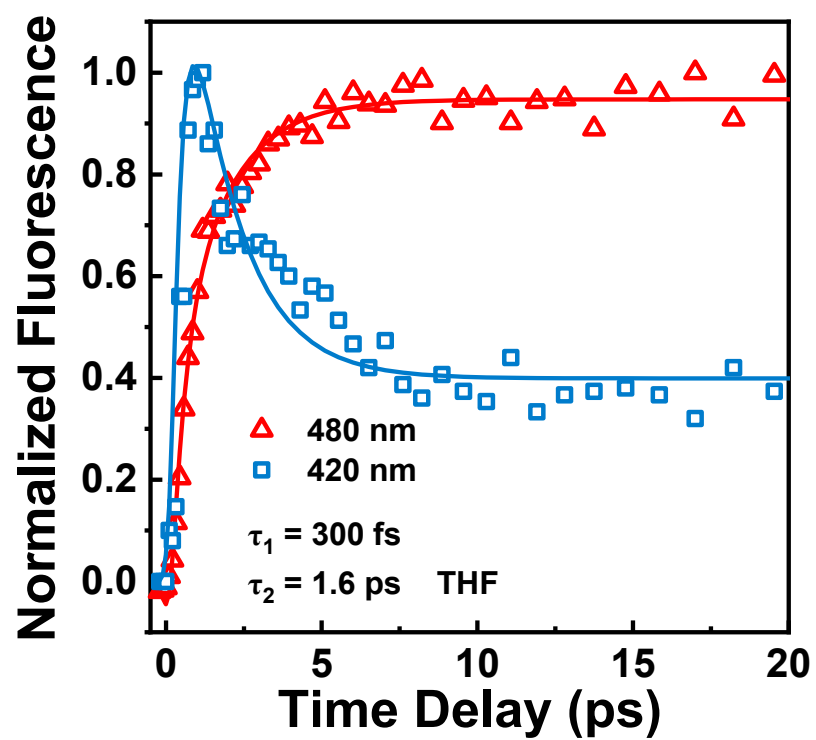

**Figure S7.** Transient amplitude of BBM-keto\* fluorescence probe at 420 nm and 480 nm in THF,  $\tau_1$  and  $\tau_2$  are retrieved from global analysis.



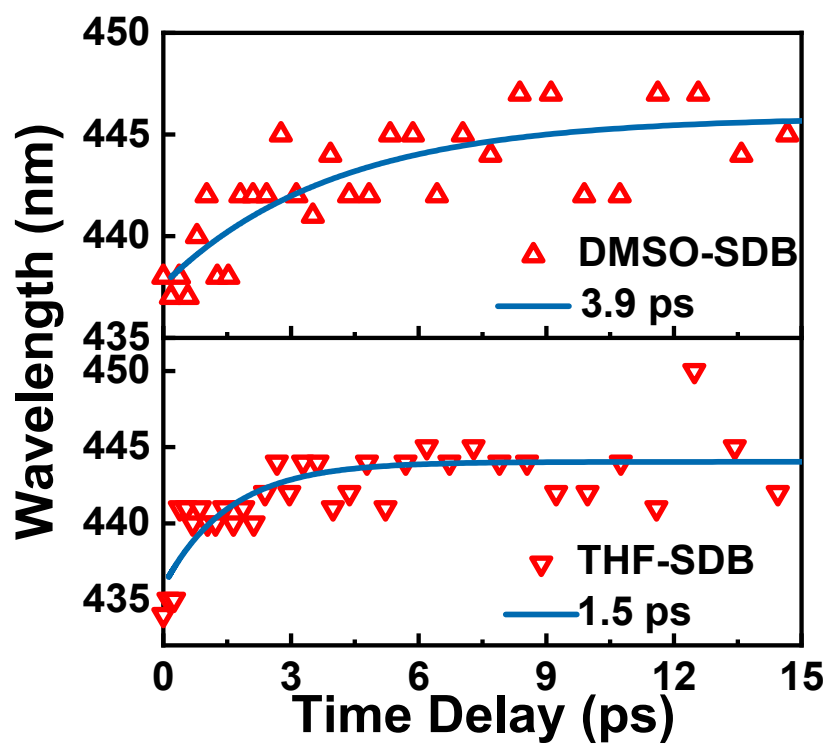

**Figure S8.** Transient fluorescence frequency shift of BBM-keto\* in DMSO and THF.

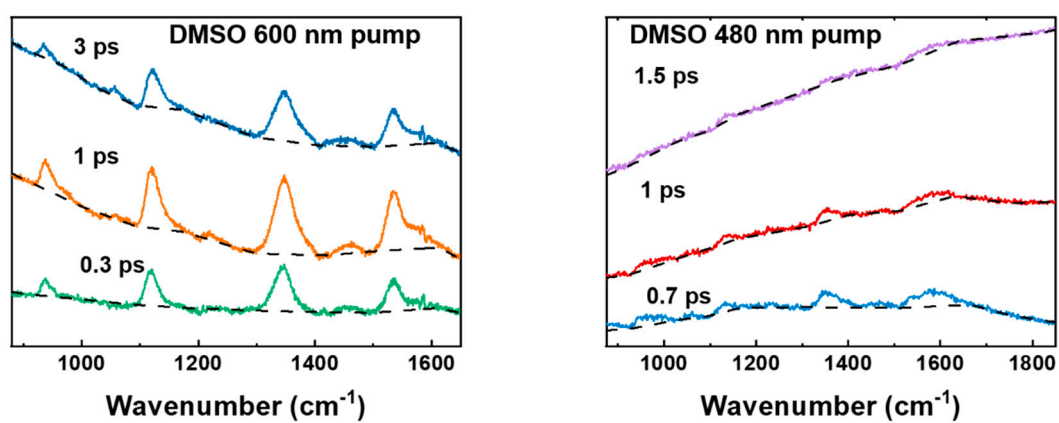

**Figure S9.** Excited state stimulated Raman data of BBM at different time delays with the baseline drawn (dash line).

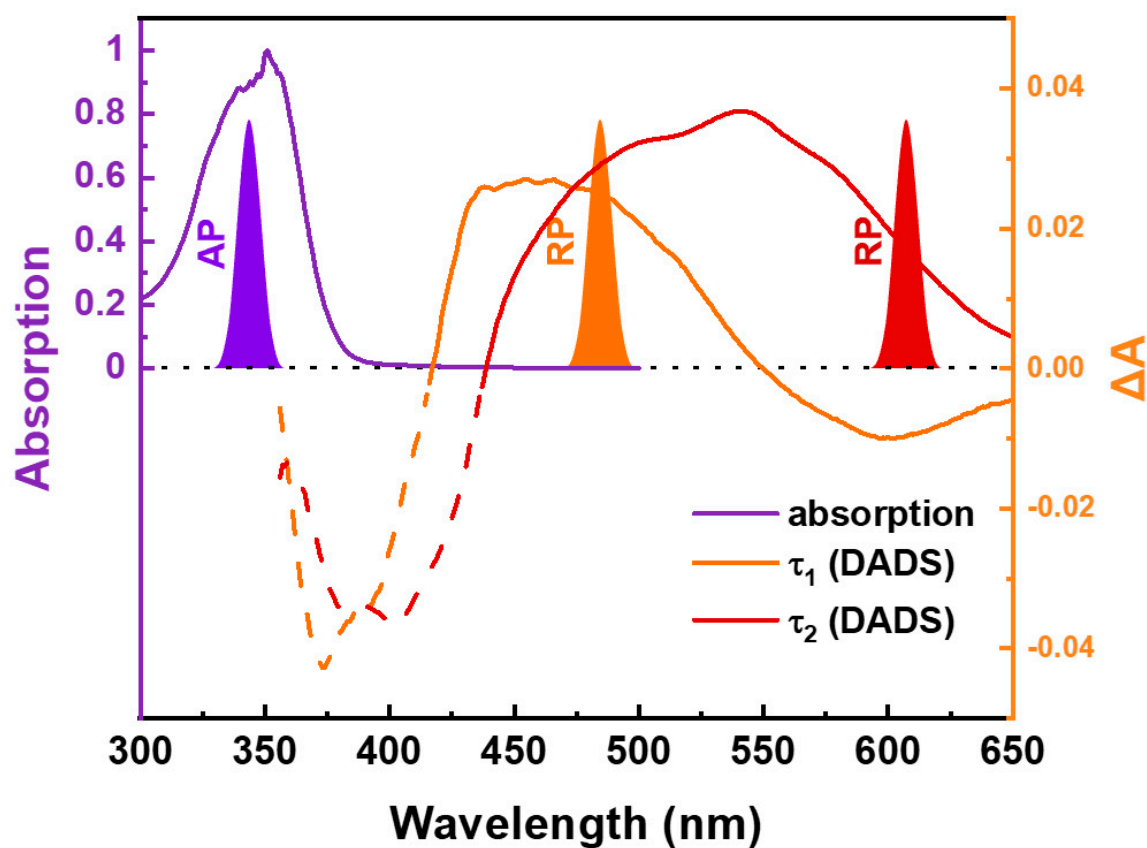

**Figure S10.** Steady-state absorption spectrum and DADS spectrum of  $\tau_1$  and  $\tau_2$  in TA. The actinic pump (AP) at 350 nm and Raman pump (RP) at 480 and 600 nm are depicted by colored spikes.

## Enol

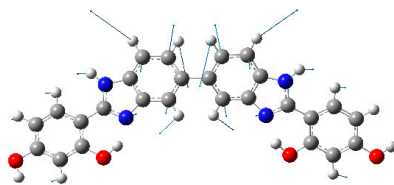

### Mode (I)

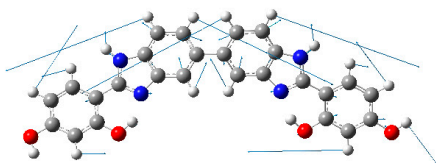

### Mode (II)

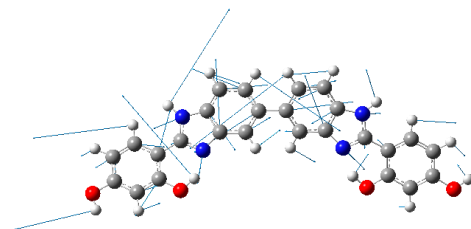

### Mode (III)

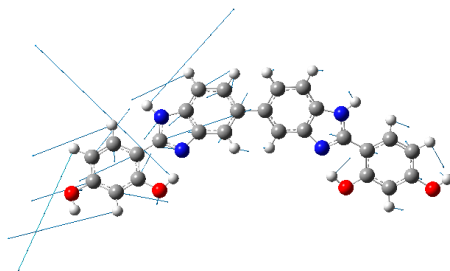

### Mode (IV)

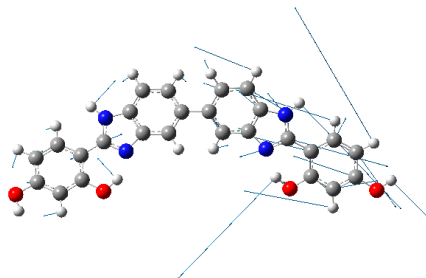

### Mode (V)

**Figure S11.** DFT calculation of BBM-Enol form showing optimized structure and Raman modes (I-V).

## Keto-pt2

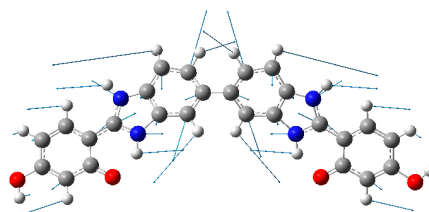

**Mode(I)**

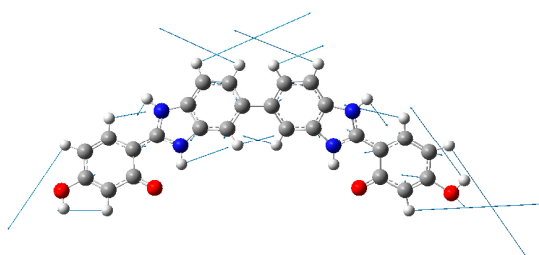

**Mode(II)**

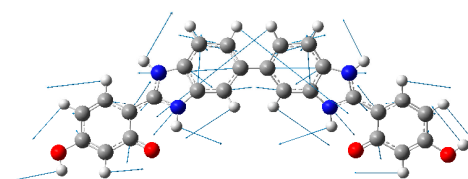

**Mode(III)**

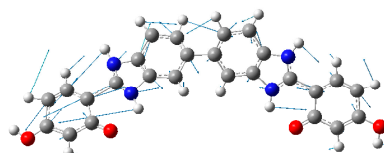

**Mode(IV)**

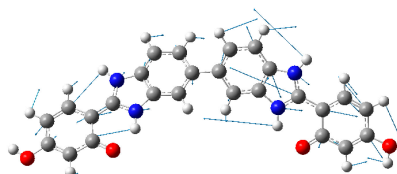

**Mode(V)**

**Figure S12.** DFT calculation BBM-Keto form (ESIPT occurs in both HBI halves) showing optimized structure and Raman modes (I-V).

## Keto-pt1

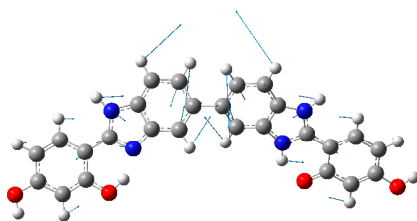

### Mode(I)

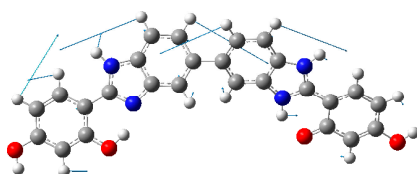

### Mode(II)

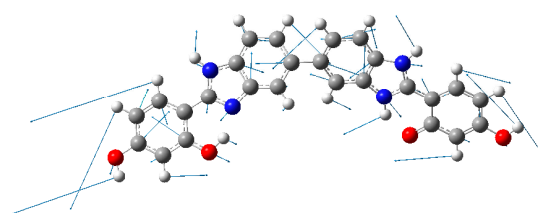

### Mode(III)

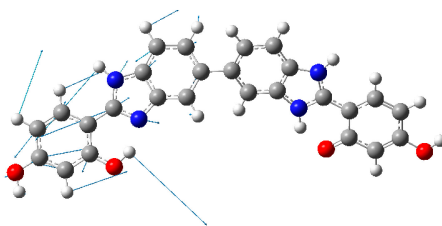

### Mode(IV)

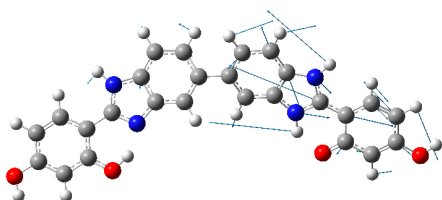

### Mode(V)

**Figure S13.** DFT calculation (ESIPT occurs in one HBI halve) showing optimized structure and Raman modes (I-V).

**Table S1.** Detailed description of Raman modes was achieved through experiment (exp) and DFT calculations (theo).

|       |       | enol | keto-pt2 <sup>[a]</sup> | keto-pt1 <sup>[b]</sup> | Vibrational mode assignment                                     |
|-------|-------|------|-------------------------|-------------------------|-----------------------------------------------------------------|
| (I)   | theo. | 960  | 959                     | 973                     | C-H bending out of plane                                        |
|       | exp.  | 953  |                         | 939                     |                                                                 |
| (II)  | theo. | 1160 | 1166                    | 1163                    | C-H wagging in plane                                            |
|       | exp.  | 1130 |                         | 1122                    |                                                                 |
| (III) | theo. | 1335 | 1343                    | 1369                    | Benzene and imidazole rings stretching and C-H in plane wagging |
|       | exp.  | 1358 |                         | 1348                    |                                                                 |
| (IV)  | theo. | 1566 | 1601                    | 1595                    | C-C stretching                                                  |
|       | exp.  | 1565 |                         | 1534                    |                                                                 |
| (V)   | theo. | 1570 | 1604                    | 1633                    | C-C stretching                                                  |
|       | exp.  | 1587 |                         | 1568                    |                                                                 |

[a] DFT results for ESIPT occurred in one HBI half of BBM-keto form

[b] DFT results for ESIPT occurred in two HBI halves of BBM-keto form

**Table S2.** Atomic coordinates of Enol Keto-pt2 and Keto-pt1 by DFT calculation.**Enol**

| Tag | Symbol | X        | Y        | Z        |
|-----|--------|----------|----------|----------|
| 1   | C      | -2.87443 | 0.722347 | -0.00211 |
| 2   | C      | -3.49094 | 1.883843 | -0.51372 |
| 3   | C      | -2.75829 | 3.026157 | -0.82667 |
| 4   | C      | -1.38525 | 2.975014 | -0.61233 |
| 5   | C      | -0.73776 | 1.824311 | -0.09883 |
| 6   | C      | -1.49484 | 0.68923  | 0.209934 |
| 7   | C      | -5.0009  | 0.290679 | -0.13694 |
| 8   | H      | -3.22829 | 3.915454 | -1.22875 |
| 9   | H      | -0.78818 | 3.841873 | -0.86866 |
| 10  | H      | -1.02984 | -0.19646 | 0.625857 |
| 11  | H      | -5.56566 | 2.193726 | -0.91548 |
| 12  | C      | 0.737179 | 1.822852 | 0.103209 |
| 13  | C      | 1.387176 | 2.972867 | 0.615159 |
| 14  | C      | 1.491895 | 0.685998 | -0.20475 |
| 15  | H      | 0.791869 | 3.841108 | 0.870924 |
| 16  | C      | 2.871748 | 0.716848 | 0.006131 |
| 17  | H      | 1.025001 | -0.19921 | -0.61956 |
| 18  | C      | 3.490759 | 1.877859 | 0.515759 |
| 19  | C      | 2.760427 | 3.021792 | 0.828338 |
| 20  | H      | 3.232357 | 3.910713 | 1.228992 |
| 21  | C      | 4.997625 | 0.282072 | 0.137978 |
| 22  | H      | 5.566324 | 2.185258 | 0.913785 |
| 23  | C      | 6.263923 | -0.4275  | 0.052882 |
| 24  | C      | 8.684112 | -0.52939 | 0.345805 |
| 25  | C      | 7.493278 | -2.45998 | -0.51352 |
| 26  | C      | 8.681608 | -1.84816 | -0.13032 |
| 27  | H      | 9.611587 | -0.05406 | 0.643799 |
| 28  | H      | 7.496814 | -3.47864 | -0.88074 |
| 29  | C      | -6.26768 | -0.4177  | -0.05481 |
| 30  | C      | -6.29046 | -1.75367 | 0.425871 |
| 31  | C      | -7.48907 | 0.166099 | -0.43673 |
| 32  | C      | -7.49968 | -2.44925 | 0.507515 |
| 33  | C      | -8.68737 | -0.51929 | -0.35766 |
| 34  | H      | -7.50809 | 1.184238 | -0.80707 |
| 35  | C      | -8.68658 | -1.83802 | 0.11817  |
| 36  | H      | -7.49    | -3.46816 | 0.878121 |
| 37  | H      | -9.61931 | -0.05682 | -0.65602 |
| 38  | O      | -9.88876 | -2.47837 | 0.178245 |
| 39  | H      | -9.77461 | -3.37629 | 0.513524 |
| 40  | O      | -5.17235 | -2.39827 | 0.816274 |
| 41  | H      | -4.40238 | -1.77422 | 0.698158 |
| 42  | O      | 9.824684 | -2.5839  | -0.23969 |
| 43  | H      | 10.58393 | -2.06453 | 0.051968 |
| 44  | O      | 5.165138 | -2.40907 | -0.81308 |



|           |   |          |          |          |
|-----------|---|----------|----------|----------|
| <b>45</b> | H | 4.396646 | -1.78431 | -0.69362 |
| <b>46</b> | N | -3.83857 | -0.24578 | 0.223194 |
| <b>47</b> | N | -4.83818 | 1.576661 | -0.58892 |
| <b>48</b> | N | 4.83754  | 1.568681 | 0.589269 |
| <b>49</b> | N | 3.834092 | -0.253   | -0.21962 |
| <b>50</b> | C | 6.286175 | -1.76567 | -0.42767 |
| <b>51</b> | C | 7.484358 | 0.156721 | 0.429872 |
| <b>52</b> | H | 7.505886 | 1.174817 | 0.799962 |

## Keto-pt2

| <b>Tag</b> | <b>Symbol</b> | <b>X</b> | <b>Y</b> | <b>Z</b> |
|------------|---------------|----------|----------|----------|
| <b>1</b>   | C             | -2.86143 | 0.71999  | -0.00235 |
| <b>2</b>   | C             | -3.48992 | 1.868822 | -0.51168 |
| <b>3</b>   | C             | -2.75852 | 3.008485 | -0.82501 |
| <b>4</b>   | C             | -1.38392 | 2.959773 | -0.61137 |
| <b>5</b>   | C             | -0.7363  | 1.813634 | -0.09855 |
| <b>6</b>   | C             | -1.49013 | 0.673428 | 0.213043 |
| <b>7</b>   | C             | -5.0629  | 0.299366 | -0.15038 |
| <b>8</b>   | H             | -3.23151 | 3.895216 | -1.22747 |
| <b>9</b>   | H             | -0.7896  | 3.827326 | -0.86997 |
| <b>10</b>  | H             | -1.02644 | -0.21148 | 0.629677 |
| <b>11</b>  | H             | -5.56413 | 2.197932 | -0.91966 |
| <b>12</b>  | C             | 0.736979 | 1.812515 | 0.104014 |
| <b>13</b>  | C             | 1.386748 | 2.958508 | 0.614791 |
| <b>14</b>  | C             | 1.488796 | 0.670837 | -0.20653 |
| <b>15</b>  | H             | 0.793849 | 3.82724  | 0.87268  |
| <b>16</b>  | C             | 2.860489 | 0.715819 | 0.007253 |
| <b>17</b>  | H             | 1.023505 | -0.21395 | -0.62161 |
| <b>18</b>  | C             | 3.49107  | 1.86471  | 0.513989 |
| <b>19</b>  | C             | 2.761537 | 3.005767 | 0.826846 |
| <b>20</b>  | H             | 3.236134 | 3.892499 | 1.22741  |
| <b>21</b>  | C             | 5.061139 | 0.293391 | 0.151511 |
| <b>22</b>  | H             | 5.566479 | 2.192135 | 0.917457 |
| <b>23</b>  | C             | 6.284304 | -0.42873 | 0.054039 |
| <b>24</b>  | C             | 8.700628 | -0.54223 | 0.34341  |
| <b>25</b>  | C             | 7.494828 | -2.47735 | -0.52359 |
| <b>26</b>  | C             | 8.673525 | -1.87243 | -0.14198 |
| <b>27</b>  | H             | 9.637952 | -0.08416 | 0.637488 |
| <b>28</b>  | H             | 7.504757 | -3.4966  | -0.89172 |
| <b>29</b>  | C             | -6.28712 | -0.41991 | -0.0566  |
| <b>30</b>  | C             | -6.24877 | -1.78614 | 0.448644 |
| <b>31</b>  | C             | -7.51783 | 0.160918 | -0.442   |
| <b>32</b>  | C             | -7.50607 | -2.46413 | 0.517308 |
| <b>33</b>  | C             | -8.70375 | -0.5279  | -0.35898 |
| <b>34</b>  | H             | -7.54163 | 1.17885  | -0.816   |
| <b>35</b>  | C             | -8.68153 | -1.85693 | 0.127716 |

|    |   |          |          |          |
|----|---|----------|----------|----------|
| 36 | H | -7.50739 | -3.4836  | 0.889754 |
| 37 | H | -9.64362 | -0.08079 | -0.65519 |
| 38 | O | -9.88949 | -2.49287 | 0.185953 |
| 39 | H | -9.77393 | -3.3895  | 0.524729 |
| 40 | O | -5.16193 | -2.35584 | 0.812142 |
| 41 | H | -3.87642 | -1.18563 | 0.56101  |
| 42 | O | 9.825342 | -2.60166 | -0.24746 |
| 43 | H | 10.57764 | -2.07493 | 0.048359 |
| 44 | O | 5.149647 | -2.36268 | -0.80654 |
| 45 | H | 3.875421 | -1.19274 | -0.55509 |
| 46 | N | -3.86499 | -0.21369 | 0.206483 |
| 47 | N | -4.84664 | 1.570188 | -0.5908  |
| 48 | N | 4.847628 | 1.5647   | 0.590927 |
| 49 | N | 3.862602 | -0.21919 | -0.20194 |
| 50 | C | 6.241764 | -1.79679 | -0.44968 |
| 51 | C | 7.515662 | 0.150527 | 0.432405 |
| 52 | H | 7.5447   | 1.168756 | 0.805034 |

## Keto-pt1

| Tag | Symbol | X        | Y        | Z        |
|-----|--------|----------|----------|----------|
| 1   | C      | 2.858132 | 0.719015 | 0.001202 |
| 2   | C      | 3.473547 | 1.880377 | 0.504553 |
| 3   | C      | 2.745465 | 3.022936 | 0.81335  |
| 4   | C      | 1.376253 | 2.971291 | 0.6019   |
| 5   | C      | 0.732277 | 1.820818 | 0.097014 |
| 6   | C      | 1.481703 | 0.684932 | -0.20712 |
| 7   | C      | 4.97386  | 0.294335 | 0.1359   |
| 8   | H      | 3.217719 | 3.914047 | 1.21112  |
| 9   | H      | 0.777005 | 3.839098 | 0.855879 |
| 10  | H      | 1.013256 | -0.20254 | -0.61891 |
| 11  | H      | 5.54122  | 2.192467 | 0.900671 |
| 12  | C      | -0.73541 | 1.820458 | -0.10175 |
| 13  | C      | -1.3846  | 2.966829 | -0.60165 |
| 14  | C      | -1.4825  | 0.679295 | 0.200836 |
| 15  | H      | -0.78945 | 3.837687 | -0.85357 |
| 16  | C      | -2.85162 | 0.724418 | -0.01149 |
| 17  | H      | -1.01334 | -0.20804 | 0.609624 |
| 18  | C      | -3.48175 | 1.874462 | -0.50688 |
| 19  | C      | -2.75564 | 3.016451 | -0.81098 |
| 20  | H      | -3.23206 | 3.90685  | -1.20407 |
| 21  | C      | -5.03752 | 0.308278 | -0.15561 |
| 22  | H      | -5.55144 | 2.203566 | -0.90427 |
| 23  | C      | -6.25161 | -0.42402 | -0.05674 |
| 24  | C      | -8.65976 | -0.56768 | -0.32708 |
| 25  | C      | -7.41969 | -2.48438 | 0.516152 |
| 26  | C      | -8.60942 | -1.89638 | 0.148683 |

|    |   |          |          |          |
|----|---|----------|----------|----------|
| 27 | H | -9.60695 | -0.12088 | -0.61105 |
| 28 | H | -7.41281 | -3.50682 | 0.878648 |
| 29 | C | 6.23352  | -0.41505 | 0.055085 |
| 30 | C | 6.242652 | -1.74938 | -0.41888 |
| 31 | C | 7.454503 | 0.162773 | 0.430727 |
| 32 | C | 7.445527 | -2.45006 | -0.49945 |
| 33 | C | 8.645226 | -0.52802 | 0.352493 |
| 34 | H | 7.479798 | 1.183807 | 0.7968   |
| 35 | C | 8.634802 | -1.84659 | -0.11626 |
| 36 | H | 7.428683 | -3.47175 | -0.86565 |
| 37 | H | 9.582028 | -0.07043 | 0.646827 |
| 38 | O | 9.822398 | -2.49057 | -0.17549 |
| 39 | H | 9.696932 | -3.38636 | -0.5044  |
| 40 | O | 5.126029 | -2.37885 | -0.79946 |
| 41 | H | 4.365488 | -1.74098 | -0.67799 |
| 42 | O | -9.74007 | -2.6372  | 0.258515 |
| 43 | H | -10.4975 | -2.11773 | -0.02774 |
| 44 | N | 3.816682 | -0.24499 | -0.21956 |
| 45 | N | 4.813243 | 1.574995 | 0.578761 |
| 46 | N | -4.83121 | 1.576093 | -0.58382 |
| 47 | C | -6.18254 | -1.78745 | 0.435899 |
| 48 | C | -7.48747 | 0.140597 | -0.42085 |
| 49 | H | -7.53192 | 1.162159 | -0.78673 |
| 50 | N | -3.84738 | -0.20769 | 0.190822 |
| 51 | H | -3.88779 | -1.19295 | 0.53584  |
| 52 | O | -5.0816  | -2.33582 | 0.779076 |

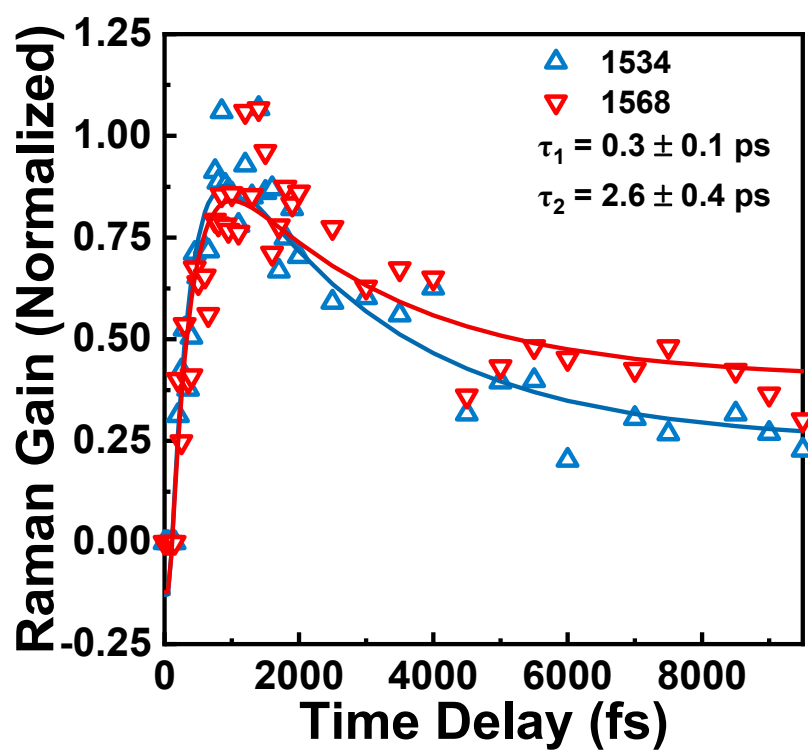

**Figure S14.** Transient amplitude Raman modes IV and V of BBM-keto\* in THF with 600 nm Raman pump excitation.

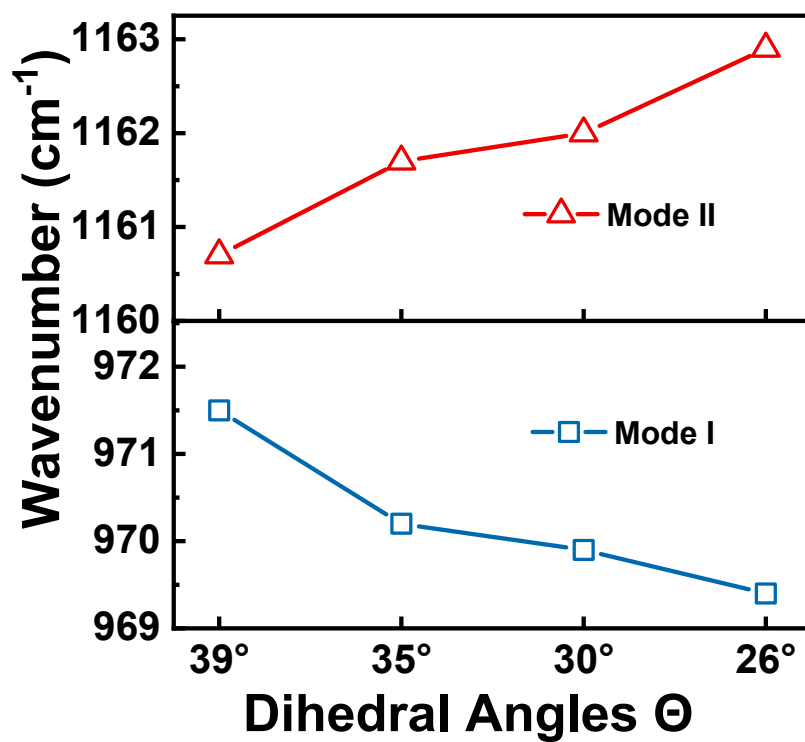

**Figure S15.** Transient frequency shift of BBM-keto\* in TD-DFT calculation.

**Table S3.** TD-DFT calculation of emission wavelength and oscillator strength of BBM-keto\* at  $\Theta = 35^\circ$ ,  $30^\circ$ , and  $26^\circ$ .

| $\Theta$                 | $35^\circ$ | $30^\circ$ | $26^\circ$ |
|--------------------------|------------|------------|------------|
| Emission wavelength (nm) | 419        | 420        | 421        |
| Oscillator strength      | 0.97       | 1.01       | 1.05       |

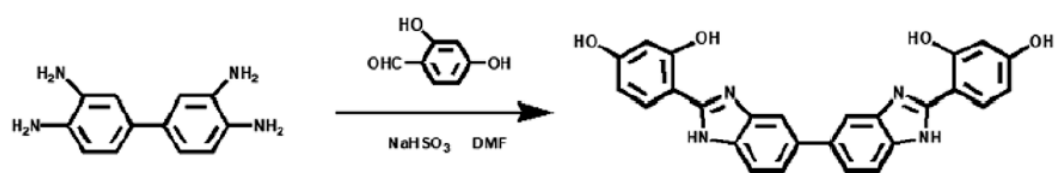

**Scheme S1.** Synthetic route of bis-benzimidazole derivative [26].
